# Supplementary material
Source: publisher figshare collection journal article supplement (https://frontiersin.figshare.com/ndownloader/files/34494887)
Supplement: Supplementary file [file 34494887]

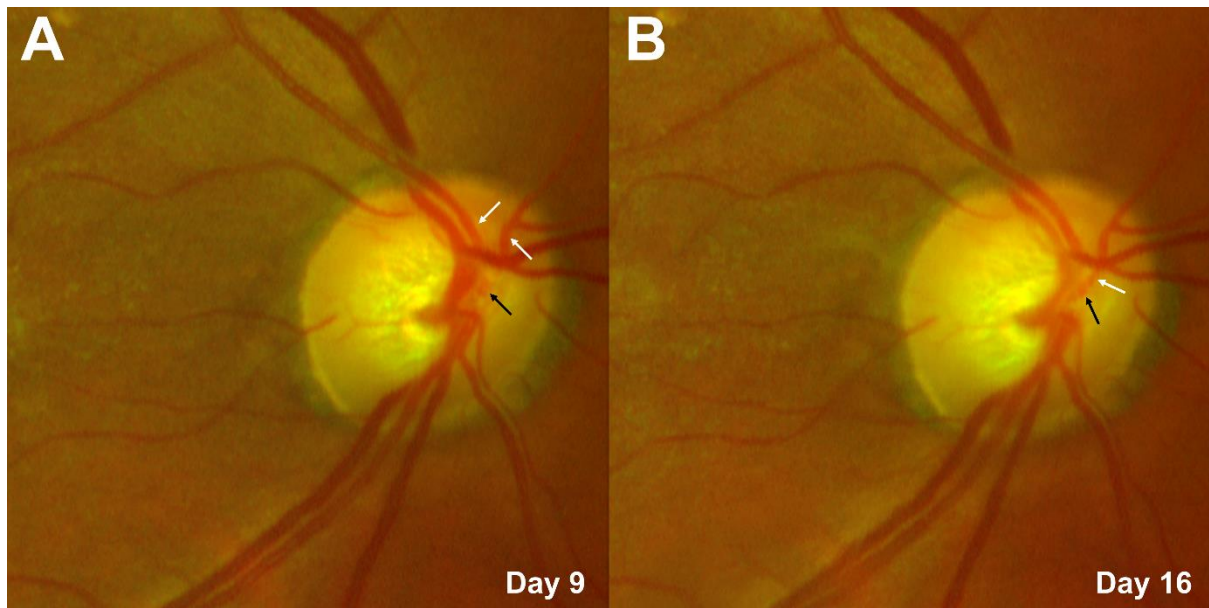

**SUPPLEMENTAL FIGURE 1. Continuous dissolution of microthrombi after the initiation of treatment** (A) On day 7 post-vaccination (2 days after treatment), thrombi in the superotemporal branch dissolved, and arterial flow increased (white arrows). However, remnant thrombi impede arterial blood flow (black arrow). (B) As the remaining thrombi progressively dissolved, arterial flow increased on day 16 post-vaccination (11 days after treatment).
